**Title- Awareness regarding Anemia in Antenatal women attending tertiary care hospitals in South India**

**Author:**

Mehul Sinha<sup>1</sup>

1- Kasturba Medical College, Mangalore

**Correspondence email-** [mehul666666@gmail.com](mailto:mehul666666@gmail.com)

**Conflict of interest-** None

NOTE: This preprint reports new research that has not been certified by peer review and should not be used to guide clinical practice.

## **ABSTRACT**

Lack of adequate nutrition during pregnancy is one of the major risk factors for the development of anemia which further leads to a high-risk pregnancy. Anemia in pregnancy accounts for one-fifth of maternal deaths and is a major factor responsible for low birth weight. The aim of the study was to evaluate the awareness about anemia among the antenatal women attending tertiary care hospitals in South India and also to find out the methods adopted by the women to prevent and correct their anemia. It was a cross-sectional type of study conducted on pregnant women who gave consent. A majority of the pregnant women were aware of the term anemia and the most common source of their knowledge was their treating physician, followed by ASHA/Anganwadi worker and friends/family. Half of the participants in the study were well aware that anemia was a problem related to blood and a majority knew that it is most common in pregnant women. Around half of the study population knew the correct value of minimum Hb level in a pregnant woman and even a lesser percentage of women knew about the consequence of severe anemia during delivery. Most of the pregnant women were including iron-rich foods normally in their diet. A majority of the respondents noticed a health benefit after taking the iron and folic acid tablets. Thus, there is a need to endorse the iron and folic acid (IFA) tablets and educate the women about the anemia in pregnancy so that the health benefits of the free supplementation program of the government percolates down to even the lower strata of the society.

**Keywords:** Pregnant women, Folic acid, anemia, nutritional status, tertiary care center

## **INTRODUCTION**

Pregnancy is a normal physiological state of the body in which there is an increase in body's demands to cope up with the growth and development of fetus within mother's body. Therefore, maternal nutrition is an area of major concern which consequently affects the health of both the mother and the fetus. Lack of adequate nutrition during pregnancy is one of the major risk factors for the development of anemia which further leads to a high-risk pregnancy. Anemia in pregnancy accounts for one fifth of maternal deaths and is a major factor responsible for low birth weight. In India, 16% maternal deaths are attributed to anemia <sup>(1)</sup>. Dietary habits play an important role in Nutritional Iron Deficiency Anemia.

Administration of Iron and Folic acid tablets during pregnancy have improved the anemic states in pregnant women. India became the first developing country to take up a National Nutritional Anemia Prophylaxis Program (NNAP) to prevent anemia among pregnant women. NNAPP was initiated in 1970 during the fourth 5-year health plan with the aim of reducing the prevalence of anemia to 25%. The Government of India recommends a minimum dose of total 100 iron and folic acid tablets to be prescribed during pregnancy. <sup>(2)</sup> According to DLHS-4 (2012-2013 survey), only 47.3% of pregnant women consumed 100 or more iron and folic acid tablets in Karnataka. <sup>(2)</sup> This number further decreases in the district of Dakshin Kannada - According to NFHS-4, only 44.4% of mothers consumed iron and folic acid tablets during their pregnancy. <sup>(2)</sup> Although iron and folic acid supplementation is given free of cost in public healthcare systems, then also there is high prevalence of anemia in pregnant women. Etiological factors include lack of awareness about anemia, non-compliance and other socio demographic factors.

Unfavourable sociodemographic factors are the major barriers to the efforts in place for the prevention of anemia during pregnancy. Educating the women only will not produce any desirable change but increasing the degree of literacy of the family will definitely help to solve this problem. The educational status of the husbands and the women are equally important factors as it makes the couple receptive to the advice given by the health staff. Therefore, there is a need for dietary counselling and nutritional education in antenatal clinics to tackle the issue of anemia in pregnancy with missionary zeal, innovative approach, and evidence-based interventions.

While women frequently recognize symptoms of anemia, they do not know the clinical term for anemia. Half of women in all countries consider these symptoms to be a priority health concern that requires action and half do not. Those women who visit prenatal health services are often familiar with iron supplements, but commonly do not know why they are prescribed.

## **AIMS AND OBJECTIVES**

- To evaluate the awareness about anemia among the antenatal women attending tertiary care hospitals in South India
- To find out the proportion of women having anemia
- To find out the methods adopted by the women to prevent and correct their anemia

## **MATERIALS AND METHODS**

**Background Information:** Mangalore, a city in the coastal belt of the State of Karnataka, in India, has a population of about 6,23,841 as per 2011 census of India. The present study will be carried out in tertiary care hospitals of Mangalore, Karnataka, India. Known for its good medical facilities, patients come here from different parts of India. The literacy rate of Mangalore is about 82.2% according to 2001 census data which includes a high female literacy rate also.

**Study design:** Cross sectional study

**Study type:** Analytical study

**Study settings:** Tertiary care hospitals affiliated with Kasturba Medical College (KMC), MAHE, Mangalore – KMCH, Attavar and Lady Goschen Hospital.

**Study population:** Antenatal Women attending tertiary care hospitals affiliated with Kasturba Medical College, Mangalore

**Inclusion criteria :** Pregnant women who give consent.

**Exclusion criteria :**

- Pregnant women who didn't give consent.
- Patients who have been diagnosed with hemolytic anemia.

**Study duration :** 13th march - 31st march 2019

**Sample size calculation :**

With proportion being 35.8% <sup>(11)</sup>, 7% of absolute precision, 95% confidence level, the sample size comes to 205, using the following formula.

$$N = \frac{Z^2 pq}{d^2}$$

Where N is sample size, Z=1.96, p is proportion = 35.8, q is (1-p) = 64.2, d = 7%.

**Sampling Strategy :** Convenient, Non random sampling

**Data Collection Methodology :**

Institutional Ethics Committee (IEC) clearance will be obtained prior to commencement of the study. Permission will be obtained from the Medical Superintendent of the above mentioned hospitals. The data will be collected using a semi-structured questionnaire designed after literature review.

**The questionnaire consists of 3 parts :**

1. Patient Particulars
2. Questions to assess knowledge about anemia
3. Practices followed to prevent or control anemia

The patients will be selected by non-random sampling and will be explained the nature and the purpose of the study in a manner comprehensible by them. A written informed consent will be taken from those willing to participate.

**Data Analysis:** Data analysis will be done using descriptive statistics. The collected data will be entered in and analyzed using SPSS (Statistical Package for Social Sciences) version 25.0. If they are willing to participate in the study, a written informed consent (Annexure I) will be obtained and they will be interviewed which includes filling up of a semi structured questionnaire (Annexure II). Chi square test will be used to correlate the association between the factors and P value  $<0.05$  will be considered statistically significant.

## RESULTS

**TABLE NO: 1. SOCIO DEMOGRAPHIC PROFILE OF STUDY SUBJECTS**

| Age                                      | N=205 | Percentage (%) |
|------------------------------------------|-------|----------------|
| 18-23                                    | 47    | 22.9           |
| 24-29                                    | 104   | 50.7           |
| 30-35                                    | 50    | 24.3           |
| >36                                      | 4     | 1.9            |
| <b>Socioeconomic status</b>              |       |                |
| Upper middle class                       | 5     | 5.2            |
| Lower middle class                       | 52    | 52.2           |
| Upper lower class                        | 62    | 30.2           |
| Lower class                              | 83    | 40.4           |
| <b>Occupation of respondents</b>         |       |                |
|                                          | N=205 | Percentage (%) |
| Housewife                                | 158   | 77.07          |
| Lecturer                                 | 9     | 4.3            |
| Hospital setting environment             | 7     | 3.4            |
| Semi-skilled                             | 10    | 4.8            |
| Shop/cleric/private/corporate            | 21    | 10.2           |
| <b>Educational status of respondents</b> |       |                |
|                                          | N=205 | Percentage (%) |
| Illiterate                               | 44    | 21.4           |
| Primary school                           | 26    | 12.6           |
| Secondary school                         | 52    | 25.3           |
| Senior secondary                         | 45    | 21.9           |
| Graduate                                 | 38    | 18.5           |
| <b>Type of family</b>                    |       |                |
| Nuclear                                  | 134   | 65.3           |
| Joint                                    | 71    | 34.6           |

**TABLE NO: 2. OBSTETRIC HISTORY OF ANTENATAL WOMEN**

| Obstetric status          | N=205 | Percentage |
|---------------------------|-------|------------|
| Primigravida              | 69    | 33.6       |
| Multigravida              | 136   | 64.6       |
| abortion                  | 42    | 20.4       |
| <b>Gestational Age</b>    |       |            |
| 1 <sup>st</sup> Trimester | 28    | 13.6       |
| 2 <sup>nd</sup> Trimester | 32    | 15.6       |
| 3 <sup>rd</sup> Trimester | 145   | 70.7       |

| <b>Trimester in which registered for ANC</b> | <b>N=205</b> | <b>Percentage (%)</b> |
|----------------------------------------------|--------------|-----------------------|
| 1st trimester                                | 200          | 97.5                  |
| 2 <sup>nd</sup> Trimester                    | 5            | 2.4                   |
| 3 <sup>rd</sup> trimester                    | 0            | 0                     |
| <b>Age at Marriage</b>                       |              |                       |
| 17-20                                        | 44           | 21.4                  |
| 21-24                                        | 102          | 49.7                  |
| 25-28                                        | 45           | 21.9                  |
| 29-32                                        | 10           | 4.8                   |
| >32                                          | 4            | 1.9                   |
| <b>Complications during pregnancy</b>        |              |                       |
|                                              | N=205        | Percentage            |
| Intrauterine death                           | 7            | 3.4                   |
| Pre-eclampsia                                | 1            | 0.4                   |
| C section                                    | 2            | 0.8                   |
| No complication                              | 192          | 93.6                  |
| <b>Hb status</b>                             |              |                       |
| Moderate anemia<br>(7-9.9gm%)                | 135          | 65.8                  |
| Mild anemia<br>(10-10.9gm%)                  | 32           | 15.6                  |
| Normal (>11gm%)                              | 23           | 11.2                  |

**TABLE NO: 3. AWARENESS REGARDING ANEMIA**

| <b>Awareness about the term anemia</b>                                     | <b>N = 205</b> | <b>Percentage</b>     |
|----------------------------------------------------------------------------|----------------|-----------------------|
| Aware                                                                      | 139            | 67.8                  |
| Not aware                                                                  | 66             | 32.6                  |
| <b>Source of information on anemia</b>                                     |                |                       |
| Treating physician                                                         | 96             | 46.8                  |
| Anganwadi/ASHA worker                                                      | 42             | 20.4                  |
| Internet/social media                                                      | 11             | 5.3                   |
| Friends/family                                                             | 31             | 15.1                  |
| College/school                                                             | 19             | 9.2                   |
| Not applicable                                                             | 6              | 2.9                   |
| <b>Perception of Anemia</b>                                                | <b>N=205</b>   | <b>Percentage (%)</b> |
| Natural state of pregnancy                                                 | 64             | 31.2                  |
| Increased Body weight                                                      | 16             | 7.8                   |
| Problem related to blood                                                   | 113            | 55.1                  |
| Increase in Blood sugar                                                    | 12             | 5.8                   |
| <b>Who is at high risk of being an anemic?</b>                             |                |                       |
| Male Adolescent                                                            | 8              | 3.9                   |
| Pregnant women                                                             | 165            | 81.6                  |
| Disabled patients                                                          | 12             | 5.8                   |
| Diabetics                                                                  | 20             | 9.7                   |
| <b>Perception of Anemia</b>                                                | <b>N=205</b>   | <b>Percentage (%)</b> |
| Natural state of pregnancy                                                 | 64             | 31.2                  |
| Increased Body weight                                                      | 16             | 7.8                   |
| Problem related to blood                                                   | 113            | 55.1                  |
| Increase in Blood sugar                                                    | 12             | 5.8                   |
| <b>What should the minimum Hb level be in a pregnant woman?</b>            | <b>N=205</b>   | <b>Percentage (%)</b> |
| Correct response                                                           | 65             | 31.7                  |
| Wrong response                                                             | 52             | 25.3                  |
| Don't know                                                                 | 86             | 42.5                  |
| <b>What is the consequence of anemia during delivery?</b>                  |                |                       |
| Death of baby                                                              | 30             | 14.6                  |
| Difficulty in delivery                                                     | 73             | 35.6                  |
| Post-partum haemorrhage                                                    | 56             | 27.3                  |
| Don't know                                                                 | 46             | 22.4                  |
| <b>Does pregnancy create a greater demand of Iron?</b>                     |                |                       |
| Yes                                                                        | 164            | 80                    |
| <b>Does repeated pregnancy causes anemia?</b>                              |                |                       |
| Yes                                                                        | 125            | 60.9                  |
| <b>Are citrus fruits a rich source of vitamin C which prevents anemia?</b> |                |                       |
| Yes                                                                        | 145            | 70.7                  |



**TABLE NO: 4. CAUSES, SIGNS AND SYMPTOMS OF ANEMIA**

| <b>Is anemia communicable disease?</b>                                 | <b>N=205</b> | <b>Percentage (%)</b> |
|------------------------------------------------------------------------|--------------|-----------------------|
| <b>Yes</b>                                                             | <b>64</b>    | <b>31.2</b>           |
| <b>Can infections cause anemia?</b>                                    |              |                       |
| <b>Yes</b>                                                             | <b>133</b>   | <b>65.8</b>           |
| <b>Can consumption of contaminated food and water cause anemia?</b>    |              |                       |
| <b>Yes</b>                                                             | <b>113</b>   | <b>55.1</b>           |
| <b>Can heavy blood loss due to menstruation cause anemia?</b>          |              |                       |
| <b>Yes</b>                                                             | <b>149</b>   | <b>72.6</b>           |
| <b>How would you identify an anemic person?</b>                        |              |                       |
| <b>She appears pale</b>                                                | <b>129</b>   | <b>62.9</b>           |
| <b>She suffers from seizures</b>                                       | <b>18</b>    | <b>8.7</b>            |
| <b>Red face with flushing</b>                                          | <b>40</b>    | <b>19.5</b>           |
| <b>Bluish discoloration of extremities</b>                             | <b>18</b>    | <b>8.7</b>            |
| <b>Do anemic patients become breathless easily?</b>                    |              |                       |
| <b>Yes</b>                                                             | <b>110</b>   | <b>54.4</b>           |
| <b>Do anemic patients normally experience fatigue and tiredness?</b>   |              |                       |
| <b>Yes</b>                                                             | <b>177</b>   | <b>86.3</b>           |
| <b>Excessive vomiting and diarrhea are signs of anemia?</b>            |              |                       |
| <b>Yes</b>                                                             | <b>111</b>   | <b>54.1</b>           |
| <b>Burning urination with increased frequency is a sign of anemia?</b> |              |                       |
| <b>Yes</b>                                                             | <b>81</b>    | <b>39.5</b>           |

**TABLE NO: 5. PREVENTION OF ANEMIA**

| <b>Can anemia be prevented?</b>                                     | <b>N=205</b> | <b>Percentage (%)</b> |
|---------------------------------------------------------------------|--------------|-----------------------|
| Yes                                                                 | 166          | 89.5                  |
| No                                                                  | 39           | 10.5                  |
| <b>How do you prevent/ correct anemia?</b>                          |              |                       |
| By taking Iron and folic acid tablets and iron rich diet            | 117          | 57                    |
| By taking calcium supplements                                       | 21           | 10.2                  |
| By taking insulin injection                                         | 16           | 7.8                   |
| Not sure / Don't know                                               | 51           | 24.8                  |
| <b>Can regular exercise prevent anemia?</b>                         |              |                       |
| Yes                                                                 | 138          | 67.3                  |
| No                                                                  | 67           | 32.7                  |
| <b>Name few iron rich foods</b>                                     |              |                       |
| Green leafy vegetables                                              | 61           | 29.7                  |
| Dry fruits                                                          | 14           | 6.8                   |
| Non-Vegetarian                                                      | 28           | 13.6                  |
| Milk                                                                | 10           | 4.8                   |
| Fruits                                                              | 97           | 47.3                  |
| Cereals and Pulses                                                  | 15           | 7.3                   |
| <b>Do you normally include the above food items in your diet?</b>   |              |                       |
| Yes                                                                 | 155          | 75.6                  |
| <b>Have you taken deworming tablets previously?</b>                 |              |                       |
| Yes                                                                 | 99           | 48.2                  |
| <b>Did you change your normal dietary pattern during pregnancy?</b> |              |                       |
| Yes                                                                 | 67           | 32.6                  |
| <b>If so, what were the changes?</b>                                |              |                       |
| Decreased intake of carbohydrates and fats                          | 8            | 3.9                   |
| Increased vitamin and iron rich food                                | 13           | 6.3                   |
| Increased protein rich food                                         | 10           | 4.8                   |
| Increased fruits and Vegetables                                     | 36           | 17.5                  |
| No change                                                           | 138          | 67.3                  |

**TABLE NO: 6. PRACTICES FOLLOWED TO PREVENT OR CORRECT ANEMIA**

| <b>Respondents noticed a health benefit's of taking the tablets and therefore continued taking them</b>                                           | <b>N=205</b> | <b>Percentage (%)</b> |
|---------------------------------------------------------------------------------------------------------------------------------------------------|--------------|-----------------------|
| Noticed a benefit                                                                                                                                 | 157          | 76.5                  |
| Did not notice a benefit                                                                                                                          | 48           | 23.2                  |
| <b>Respondents increased the intake of Iron rich food/ fortified foods to control anemia</b>                                                      |              |                       |
| Increased                                                                                                                                         | 163          | 79.5                  |
| Did not increase                                                                                                                                  | 42           | 20.5                  |
| <b>Respondents took their Iron and folic acid (IFA) supplements as per prescription (regularly)</b>                                               |              |                       |
| Yes                                                                                                                                               | 165          | 80.4                  |
| <b>Respondents started including more non-veg food in their diet following a fall in their Hb levels</b>                                          |              |                       |
| Yes                                                                                                                                               | 103          | 50.2                  |
| <b>Respondents continued to take the preventive supplementation regimen after the completion of their 3 months of therapeutic supplementation</b> |              |                       |
| Continued                                                                                                                                         | 130          | 63.4                  |
| Did not continue                                                                                                                                  | 75           | 36.6                  |
| <b>Respondents came for regular follow ups as instructed by their physician</b>                                                                   |              |                       |
| Yes                                                                                                                                               | 184          | 89.7                  |

|    |   |      |
|----|---|------|
| No | 6 | 10.3 |
|----|---|------|

## **DISCUSSION**

Most of the women who participated in the study belonged to the lower class of economic status with housewife as their occupation. Majority of the women who participated in the study had basic level of education and only one –fifth of them were illiterate, living in a nuclear family. Most of the antenatal women were multi gravida who were in their 3rd trimester of pregnancy. Our study group included most of the women who were moderately anemic. A majority of the pregnant women were aware of the term anemia and the most common source of their knowledge was their treating physician, followed by ASHA/Anganwadi worker and friends/family. Half of the participants in the study were well aware that anemia was a problem related to blood and a majority knew that it is most common in pregnant women. Around half of the study population knew the correct value of minimum Hb level in a pregnant woman and even a lesser percentage of women knew about the consequence of severe anemia during delivery.

Most of the respondents knew that pregnancy creates a demand of iron. Almost two-thirds women knew that anemia is a non-communicable disease which is caused due to heavy blood loss during menstruation. Majority of the patients knew the clinical signs and symptoms of anemia. Almost more than half the respondents knew that anemia can be prevented by increasing the intake of iron rich foods like green leafy vegetables and fruits in their diet.

Half of the women thought that anemia can also be prevented by exercise which is a myth. Most of the pregnant women were including iron rich foods normally in their diet. A majority of the respondents noticed a health benefit after taking the Iron and folic acid tablets. Half of the pregnant women also started including more nonveg food items in their diet after a fall in their Hb levels. Most of the women took their IFA tablets very regularly to prevent anemia. More than half the population continued the preventive dose of IFA tablets even after the prophylactic dose of 3 months due to its health benefit. Almost all of the Antenatal women in their 3<sup>rd</sup> trimester who were registered under the ANC program visited their physician regularly for follow ups. Therefore, there is a positive correlation between the education level of women and the awareness regarding anemia in Antenatal women.

## **CONCLUSION**

While women frequently recognize symptoms of anemia, they do not know the clinical term for anemia. Half of women in all countries consider these symptoms to be a priority health concern that requires action and half do not. Those women who visit prenatal health services regularly are often familiar with iron supplements and their health benefits. Thus, there is a need to endorse the IFA tablets and educate the women about the anemia in pregnancy so that the health benefits of the free supplementation program of the government percolates down to even the lower strata of the society.

## REFERENCE

- 1 - Government of India (sample registration system). Maternal mortality in India: 1997-2003, Trends, causes and risk factors. Register General India, New Delhi in collaboration with Centre for Global Health Research University of Toronto, Canada. -
- 2 - Agarwal DK, Agarwal KN, Roychaudhary S. Targets in national anaemia prophylaxis program for pregnant women. Indian Pediatric Journal 1988;25:319-22
- 3 - Lokare PO, Karanjekar VD, Gattani PL, Kulkarni AP. A study of prevalence of anemia and sociodemographic factors associated with anemia among pregnant women in Aurangabad city, India. Ann Nigerian Med 2012;6:30-4
- 4-Taye B, Abeje G, Mekonen A. Factors associated with compliance of prenatal iron folate supplementation among women in Mecha district, Western Amhara: a cross-sectional study. Pan African Medical Journal. 2015;20(1).
- 5-Stoltzfus RJ, Dreyfuss ML. Guidelines for the use of iron supplements to prevent and treat iron deficiency anemia. Washington, DC: Ilsi Press; 1998.
- 6-Gedefaw L, Ayele A, Asres Y, Mossie A. Anaemia and associated factors among pregnant women attending antenatal care clinic in Walayita Sodo town, Southern Ethiopia. Ethiopian journal of health sciences. 2015;25(2):155-64.
- 7- Brabin JB, Hakimi M, Pelletier D. An Analysis of Anemia and Pregnancy-Related Maternal Mortality. The Journal of Nutrition 2001;131(2):604-15
- 8- Shitie D, Zewde T, Molla Y. Anemia and other hematological profiles of pregnant women attending antenatal care in Debre Berhan Referral Hospital, North Shoa, Ethiopia. BMC Research Notes 2018;11:704
- 9- Vijayaraghavan K, Brahmam GNV, Nair KM et al. Evaluation of national nutritional anemia prophylaxis program. Indian J Pediatr 1990; 57(2): 183-9.
- 10- Seck BC, Jackson RT. Determinants of compliance with iron supplementation among pregnant women in Senegal. Public health nutrition. 2008 Jun;11(6):596-605.

WITHDRAWN  
see manuscript DOI for details
